# Supplementary material
Source: Springer Nature journal article supplement (https://www.springermedizin.de/resource/supplementary/12955_2006_362_MOESM1_ESM.pdf/9560240)
Supplement: MOESM1 [file 9560240]

**Have you had difficulty  
running?**

never (4)

sometimes

often

**During this, I felt:**

(very) good  
(3)

not so well (2)

rather bad (1)

bad  
(0)
